# Supplementary material
Source: Springer Nature journal article supplement (https://www.springermedizin.de/resource/supplementary/12889_2013_6464_MOESM1_ESM.pdf/9498186)

**Figure 1:** COMPASS board and school recruitment results (Baseline 2012-13)

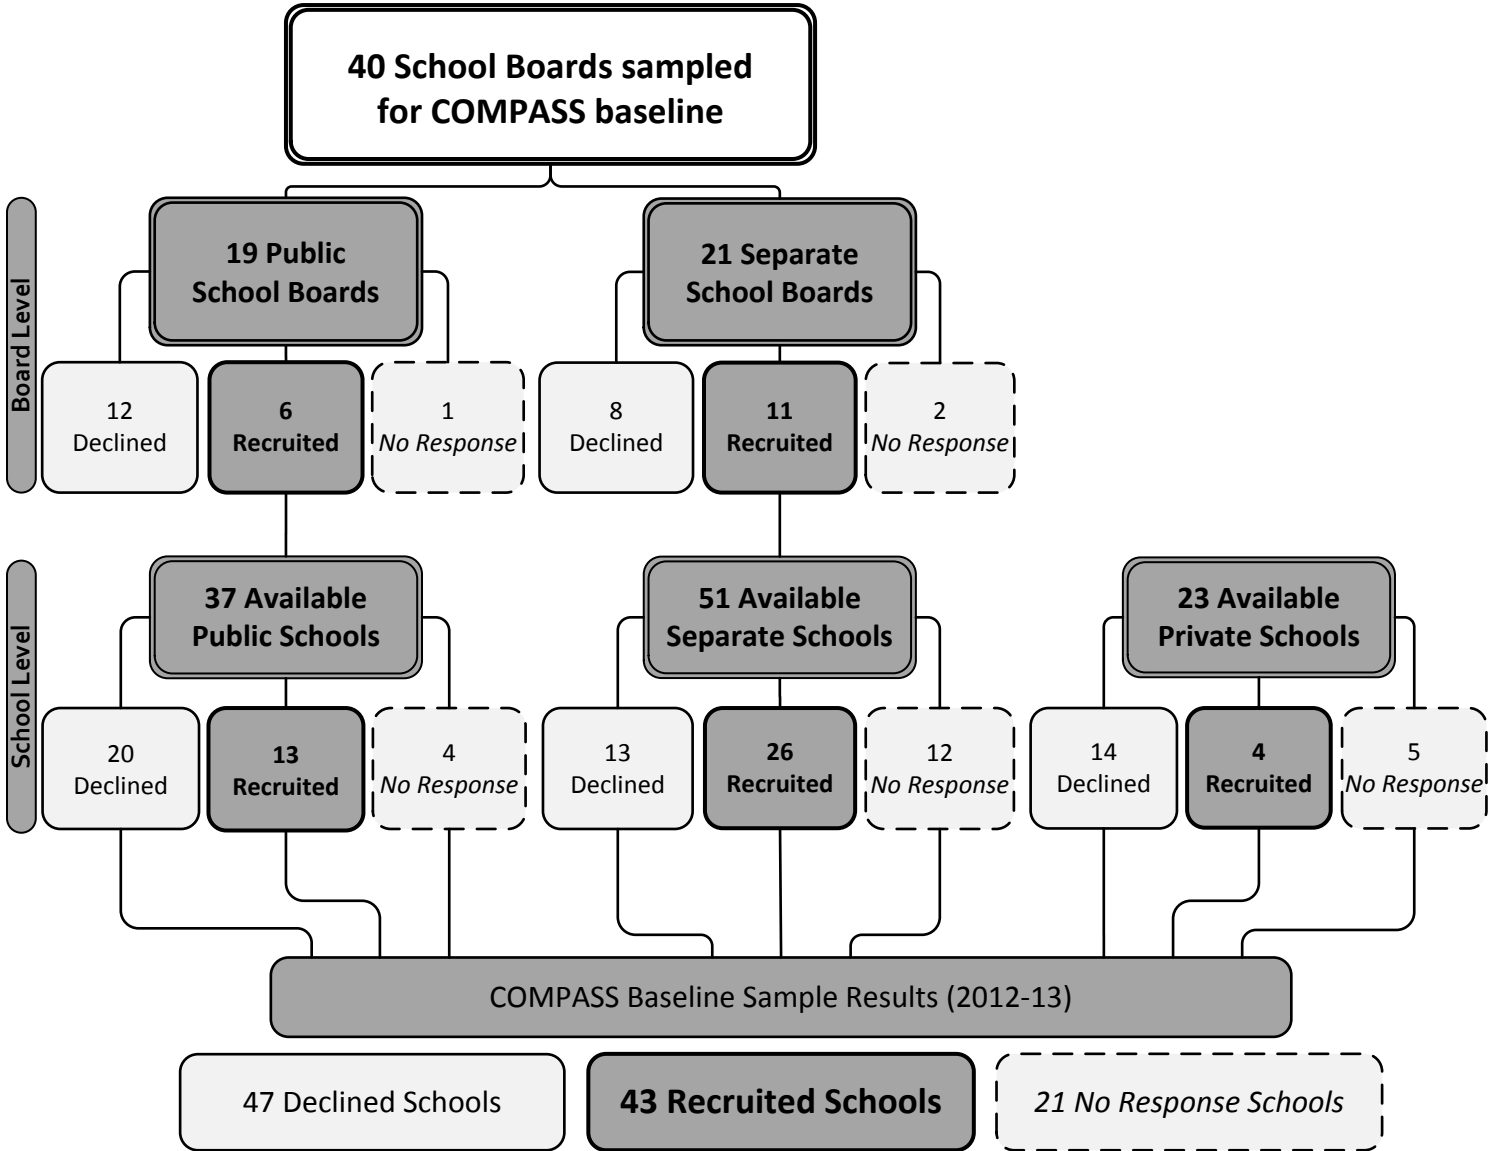

Supplement: MOESM1 [file 9498186]
